# Supplementary material for: Removal of Cd(ii) from aqueous solution by ferrate-modified sludge biochar: optimization of preparation conditions, adsorption performance, and mechanism
Source: Royal Society of Chemistry journal article supplement (doi:10.1039/d6ra00674d), 2026-05-06
Supplement: d6ra00674d1.pdf [file d6ra00674d1.pdf]

Removal of Cd(II) from Aqueous Solution by Ferrate-Modified Sludge Biochar: Optimization of Preparation Conditions, Adsorption Performance, and Mechanism

*Tao Long*<sup>a</sup>, *Xinwei Zuo*<sup>b</sup>, *Yunping Ji*<sup>c,\*</sup>, *Changquan Wang*<sup>a,\*</sup>

<sup>a</sup> *College of Resources, Sichuan Agricultural University, Chengdu 611130, China.*

<sup>b</sup> *China Nuclear Industry Survey Design & Research Co., Ltd., Zhengzhou 450002, China.*

<sup>c</sup> *China Railway First Survey and Design Institute Group Co., Ltd, Lanzhou 730000, China*

*\*Corresponding author: Yunping Ji ([shaopei13698@163.com](mailto:shaopei13698@163.com)); Changquan Wang ([chang10393@163.com](mailto:chang10393@163.com))*

### Text S1 Adsorption model

Adsorption kinetics model: the pseudo-first-order model (Eq. S1), the pseudo-second-order model (Eq. S2), Elovich model (Eq. S3), and intra-particle diffusion model (Eq. S4) were used for fitting analysis.

$$q_t = q_e(1 - e^{-k_1 t}) \quad (\text{S1})$$

$$q_t = \frac{q_e^2 k_2 t}{1 + q_e k_2 t} \quad (\text{S2})$$

$$q_t = \beta \ln(\alpha \beta) + \beta \ln(t) \quad (\text{S3})$$

$$q_t = K_{id} t^{1/2} + C_i \quad (\text{S4})$$

Where  $q_e$  and  $q_t$  are the sorption capacity at the equilibrium time and time " $t$ " time (mg/g), respectively;  $k_1$  and  $k_2$  represent sorption rate constant of the pseudo-first-order (1/min) and the pseudo-second-order (g/mg·min), respectively;  $K_{id}$  (mg/g·min<sup>1/2</sup>) is rate constants of intra-particle diffusion, respectively;  $C_i$  is constant of the intra-particle diffusion model.

Adsorption isotherm model: the Langmuir model (Eq. S5), Freundlich model (Eq. S6), and Temkin model (Eq. S7) were used to fit these data.

$$\frac{C_e}{q_e} = \frac{1}{q_{max} K_L} + \frac{C_e}{q_{max}} \quad (\text{S5})$$

$$\ln q_e = \ln K_F + \frac{\ln C_e}{n} \quad (\text{S6})$$

$$q_e = B_T \ln A_T + B_T \ln C_e \quad (\text{S7})$$

Where  $q_e$  is the sorption capacity at equilibrium (mg/g);  $C_e$  is the concentration of Cd(II) at sorption equilibrium (mg/L);  $q_{max}$ , and  $K_L$  are the maximum sorption capacity of Cd(II) (mg/g), and Langmuir equilibrium constant (L/mg), respectively;  $K_F$  and  $n$  represent the Freundlich affinity coefficient (mg<sup>1-n</sup>·L<sup>n</sup>/g) and Freundlich constant related to the surface site heterogeneity, respectively;  $A_T$  (1/g) and  $B_T$  (kJ/mol) are Temkin constants.

The thermodynamic investigation of Cd(II) removal at different temperatures (15~35°C). The thermodynamic parameters for the removal process were calculated using Eq. S8 and Eq. S9.

$$\ln K_d = \frac{\Delta S}{R} - \frac{\Delta H}{RT} \quad (\text{S8})$$

$$\Delta G = -RT \ln K \quad (\text{S9})$$

where,  $R$  is the gas constant (8.314 J/mol·K).  $K$  is the equilibrium constant and  $T$  is the Kelvin temperature (K). The  $\Delta G$ ,  $\Delta H$  and  $\Delta S$  represent the standard free energy (kJ/mol), enthalpy (kJ/mol), and entropy (J/mol·K), respectively.

### Text S2 Characterization technologies

The surface microstructure of the material was observed using a scanning electron microscope equipped with an energy-dispersive spectrometer (SEM-EDS, JSM-6490LV, JEOL, Japan). The phase composition of the material was characterized using an X-ray diffractometer (XRD, Ultima IV, Rigaku, Japan). The surface functional groups of the material were determined using a Fourier-transform infrared spectrometer (FTIR, Nicolet 6700, Thermo Fisher Scientific, USA).

**Table S1** Intra-particle diffusion model fitting results for Cd(II) removal.

| Model                    | Parameter                           | SBC    | Fe@SBC  |
|--------------------------|-------------------------------------|--------|---------|
| Intra-particle diffusion | $C_1$                               | -1.938 | 33.504  |
|                          | $K_{d1}$ (mg/g·min <sup>1/2</sup> ) | 9.033  | 11.602  |
|                          | $R_1^2$                             | 0.980  | 0.984   |
|                          | $C_2$                               | 29.582 | 98.548  |
|                          | $K_{d2}$ (mg/g·min <sup>1/2</sup> ) | 3.506  | 1.515   |
|                          | $R_2^2$                             | 0.990  | 0.984   |
|                          | $C_3$                               | 76.620 | 116.349 |
|                          | $K_{d3}$ (mg/g·min <sup>1/2</sup> ) | 0.198  | 0.144   |
|                          | $R_3^2$                             | 0.898  | 0.938   |

**Table S2** Comparison of the maximum adsorption capacity of Cd (II) by different types of adsorbents.

| Adsorbent                                   | specific surface area (m <sup>2</sup> /g) | Maximum adsorption capacity (mg/g) | References |
|---------------------------------------------|-------------------------------------------|------------------------------------|------------|
| Ferrite porous confined biochar             | 77.39                                     | 2.46                               | 1          |
| Biochar-based magnetic nanocomposite        | /                                         | 38.60                              | 2          |
| KMnO <sub>4</sub> modified biochar          | /                                         | 122.10                             | 3          |
| Magnetic biochar-montmorillonite composites | 20.60                                     | 124.71                             | 4          |
| Biochar co-doped with S, Fe, and Mn         | /                                         | 127.37                             | 5          |
| Chitosan-Modified Magnetic Biochar          | 112.08                                    | 149.30                             | 6          |
| Ferrate-Modified Sludge Biochar             | 117.24                                    | 155.28                             | This work  |

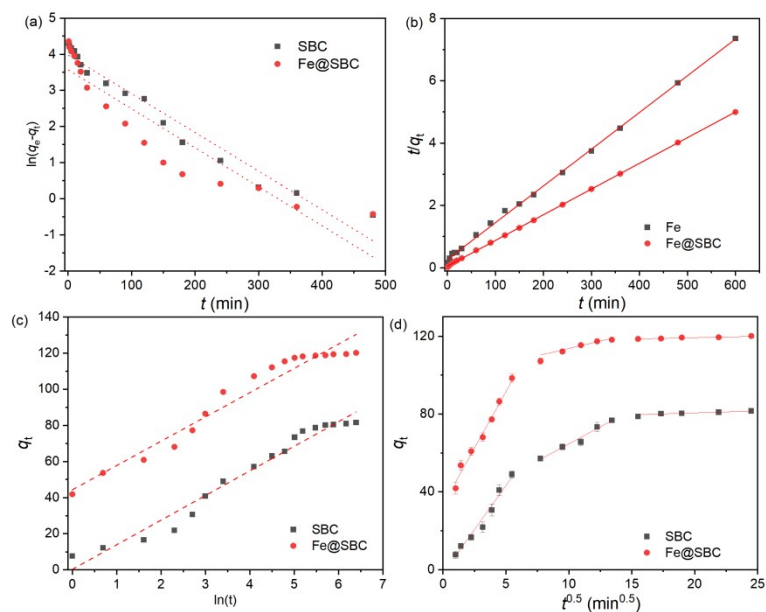

**Fig. S1** Fitting curves of the pseudo-first-order (a), pseudo-second-order (b), Elovich (c), and intra-particle (d) models for Cd(II) removal by SBC and Fe@SBC.

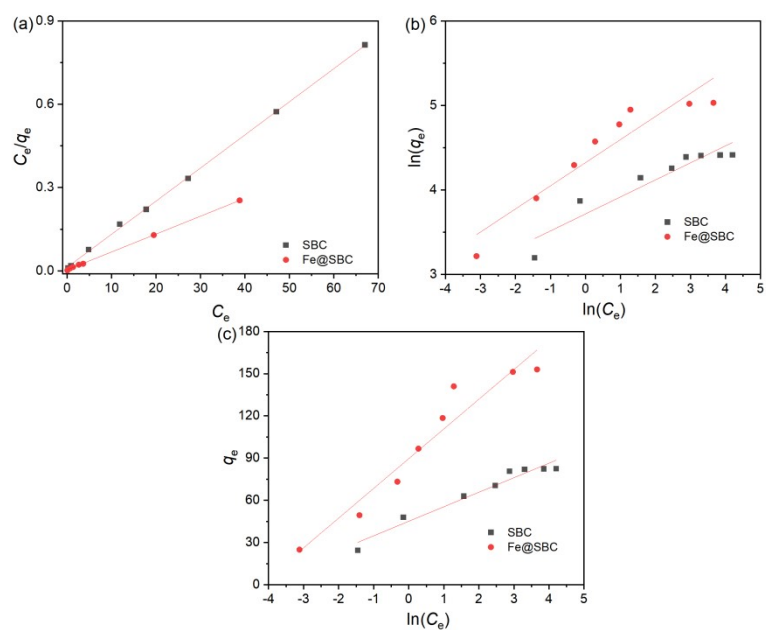

**Fig. S2** Fitting curves of the Langmuir (a), Freundlich (b), and Temkin (c) models for Cd(II) removal by SBC and Fe@SBC.

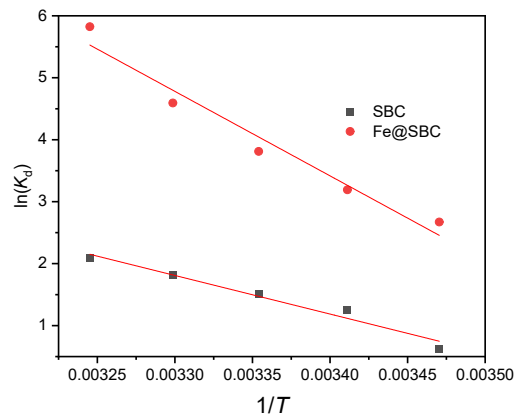

**Fig. S3** Thermodynamic fitting curve.

1. N. Liu, R. X. Zhou, S. X. Huang, J. M. Zhang, H. D. Zhang, H. Liu, X. Du, D. Y. Zhang, R. L. Zhang, Z. T. Sun, S. F. Fu and X. M. Zhan, *J. Water Process. Eng.*, 2025, **74**, 107717.
2. N. Zhang, F. Reguyal, S. Praneeth and A. K. Sarmah, *Environ. Pollut.*, 2023, **330**, 121806.
3. X. R. Liang, X. F. Rao, Q. L. Fu, J. Zhu and H. Q. Hu, *J. Environ. Chem. Eng.*, 2023, **11**, 109874.
4. Y. Zhao, J. Yao, N. Min, B. Ma, W. P. Chai and Y. Q. Ma, *Separation and Purification Technology*, 2026, **391**, 136996.
5. H. Zhang, H. Y. Huang, Y. R. Fang, J. M. Cai, X. Y. Lv, W. L. Wu, Q. Gu, R. Qian, K. R. Yu, K. H. D. Tang and R. H. Li, *Separation and Purification Technology*, 2025, **363**, 132025.
6. R. Kareem, A. Afkhami and K. H. H. Aziz, *ChemistrySelect*, 2025, **10**, e03708.
